# Supplementary material for: Alterations in Task-Related Brain Activation in Children, Adolescents and Young Adults at Familial High-Risk for Schizophrenia or Bipolar Disorder - A Systematic Review
Source: Front Psychiatry. 2020 Jul 10;11:632. doi: 10.3389/fpsyt.2020.00632 (PMC7365908; doi:10.3389/fpsyt.2020.00632)
Supplement: Supplementary file 4 [file Table_4.xlsx]

## Sheet: Emotion processing
Study	High-risk disorder	Task contrast	Region of peak activation difference	Peak activation difference	MNI coordinates			Cluster size (number of voxels)	Analysis	Cluster forming threshold
					x	y	z
Emotion processing
Healthy control > Familial high-risk
Barbour et al. 2010	SZ	Positive valenced faces vs. distorted faces	L Centro-medial nuclei (amygdala)	F = 3.94, t = 1.97	NR	NR	NR	NR	ROI	NR
Brotman et al. 2013	BD	BOLD modulations with angry face intensity	L Amygdala	F = 6.85	NR	NR	NR	NR	ROI	Probabilistic map, linear trend analysis
			R Amygdala	F = 5.29	NR	NR	NR	NR
		Neutral to angry face activity modulation	L Inferior frontal gyrus (BA46)	F = 7.70	NR	NR	NR	18	Whole-brain	linear trend analysis; P < 0.005, k > 10
		Neutral to happy face activity modulation	L Inferior frontal gyrus (BA46)	F = 11.27	NR	NR	NR	214
Hart et al. 2013	SZ	Aversive vs. neutral	L Anterior cingulate cortex	z = 2.68	-6	38	8	NR	Whole-brain	P < 0.05, FDR corrected, k > 8
		Aversive vs. neutral	L Precuneus	z = 2.7	-10	-54	36	NR
Tseng et al. 2015	BD	Succesful vs. Unsuccesful emotional face encoding	L Middle frontal gyrus (BA6/8)	F = 8.21	-42	12	48	35	Whole-brain	P < 0.001, k > 10
Familial high-risk > Healthy control
Hart et al. 2013	SZ	Aversive vs. neutral	R Central opercular cortex	z = 3.01	50	-6	2	NR	Whole-brain	P < 0.05, FDR corrected, k > 8
Ladouceur et al. 2013	BD	Emotional distraction by happy faces during 2-back memory condition	R VLPFC (BA47)	F = 8.14	36	18	-21	33	ROI	P < 0.05, FWE corrected, k(VLPFC) = 26
Manelis et al. 2015	BD	All emotional faces vs. Shape	R Amygdala	z = 3.79	24	-6	-20	171	ROI	Puncorrected < 0.005 (z > 2.57), Pcorrected < 0.05
Olsavsky et al. 2012	BD	Afraid rating vs. Passive viewing of fearful faces	R Amygdala	F = 4.31	NR	NR	NR	NR	ROI	No multiple comparison correction. Compared average activation across the entire amygdala
		Afraid rating of fearful faces vs. passive viewing of fearful faces	R Parahippocampal gyrus/amygdala	NR	24	-9	-18	78	Whole-brain	P < 0.005 uncorrected, k > 20
Tseng et al. 2015	BD	Succesful vs. Unsuccesful emotional face encoding	R Parahippocampal gyrus/uncus (BA34)	F = 9.05	12	-10	-22	127	Whole-brain	P < 0.001, k > 10
Welge et al. 2016	BD	Emotional stimuli vs. Neutral stimuli	L BA44 (inferior frontal gyrus)	Probability = 0.98	NR	NR	NR	NR	ROI	Bayesian hierarchical modelling, ROI: VLPFC (4 subregions) & ACC
Supplementary table S4: Study specific details on contrast, region of peak activation difference, MNI coordinates, cluster size, type of analysis and cluster forming threshold within the emotion processing domain. Note that the study by Diwadkar et al. 2012 did not find peak activation differences between FHR-SZ youth and HC and are not represented in the table. The study by Ladouceur et al. 2013…
